# Supplementary material for: High value-added fuel additive production from waste bio-glycerol over a versatile nanohybrid catalyst
Source: Royal Society of Chemistry journal article supplement (doi:10.1039/d3nj04606k), 2024-01-01
Supplement: d3nj04606k1.pdf [file d3nj04606k1.pdf]

## **High Value-added Fuel additive production from Waste bio-glycerol over a versatile nano-hybrid catalyst**

Vijendra Singh,<sup>a&b</sup> Selvamani Arumugam,<sup>\*a&b</sup> Deepak Joshi,<sup>a</sup> Mahesh Kumar,<sup>a&b</sup> Sadhna Semalty,<sup>c</sup> and Nagabhatla Viswanadham,<sup>\*a&b</sup>

<sup>a</sup>Light Stock Processing Division, Council of Scientific & Industrial Research-Indian Institute of Petroleum, Dehradun 248005, Uttarakhand, India.

<sup>b</sup>Academy of Scientific and Innovative Research (AcSIR), Ghaziabad-201002, India.

<sup>c</sup>Pt Lalit Mohan Sharma Campus Rishikesh, Sridev Suman Uttarakhand University Badshahithol 249199, Uttarakhand, India.

\*Corresponding Author E-mail: [Vijendranegi8@gmail.com](mailto:Vijendranegi8@gmail.com)

\*Corresponding Author E-mail: [nvish@iip.res.in](mailto:nvish@iip.res.in)

\*Corresponding Author E-mail: [a.selvamani@iip.res.in](mailto:a.selvamani@iip.res.in)

Tel: 91-135-2525856/827; Fax: 91-135-2660202

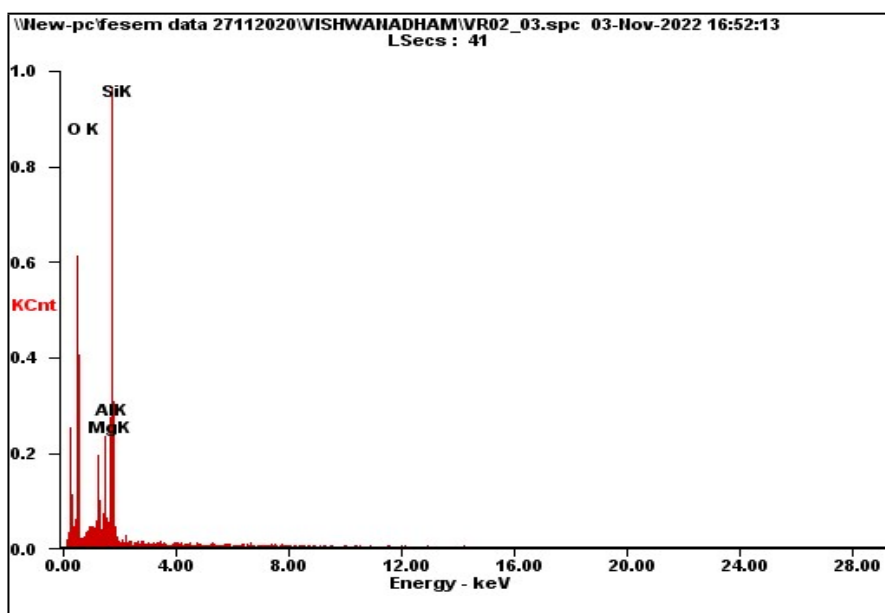

Fig. S1 EDX spectrum of MAZ hybrid catalyst sample

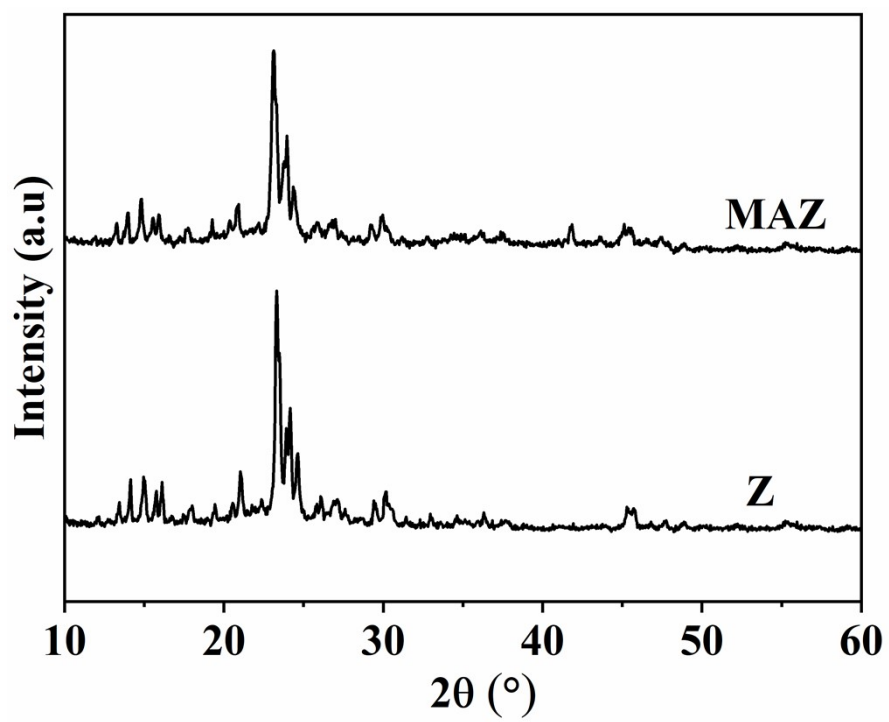

Fig. S2 XRD diffractogram of catalyst samples

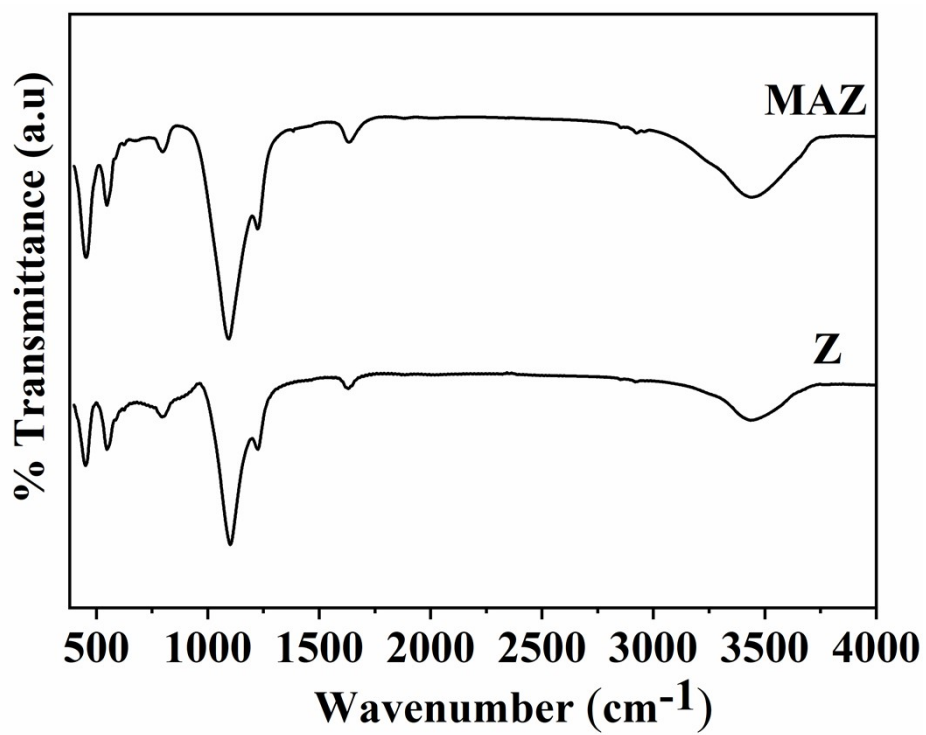

Fig. S3 FT-IR patterns of catalyst samples

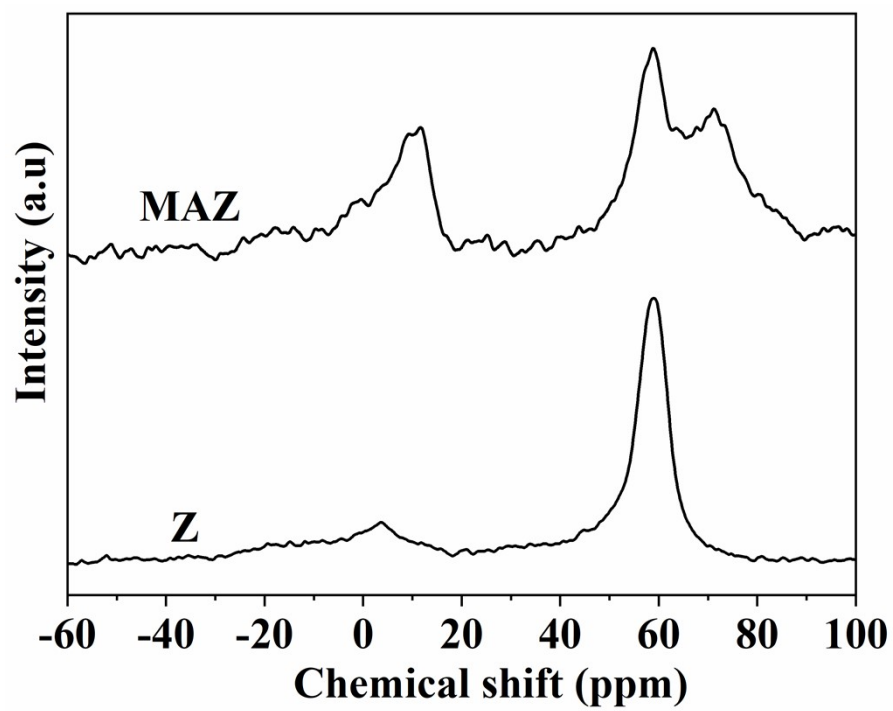

Fig. S4  $^{27}\text{Al}$  NMR spectra of catalyst samples

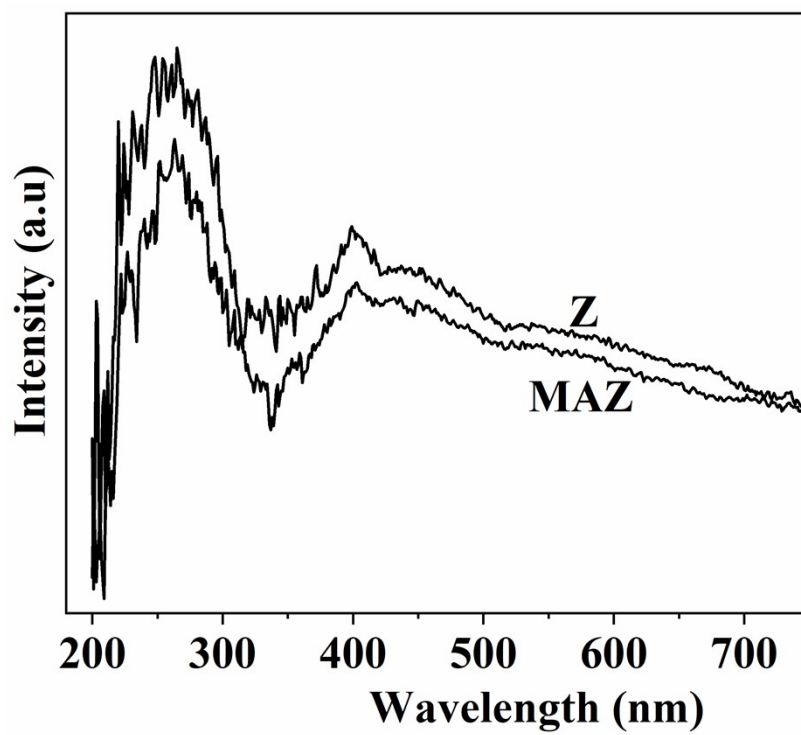

Fig. S5 UV-Vis spectra of catalyst samples

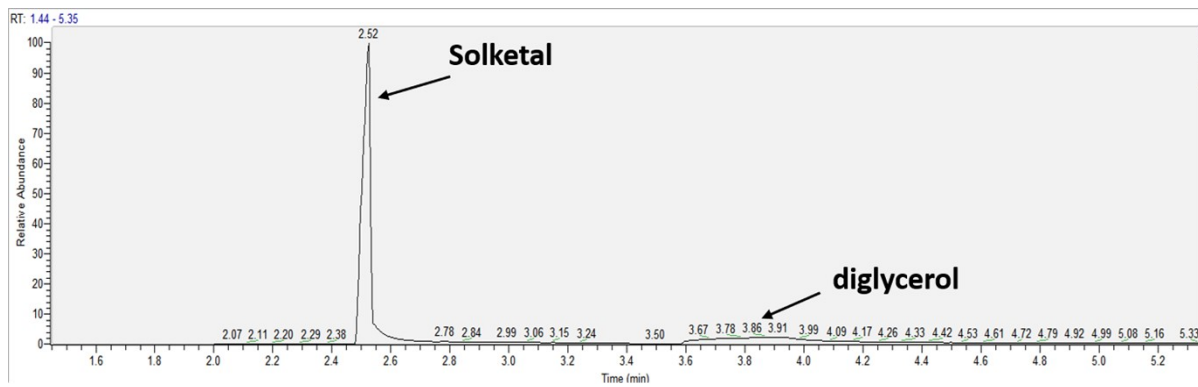

Fig. S6 GC-MS spectrum of a liquid product obtained with MAZ nanohybrid catalyst

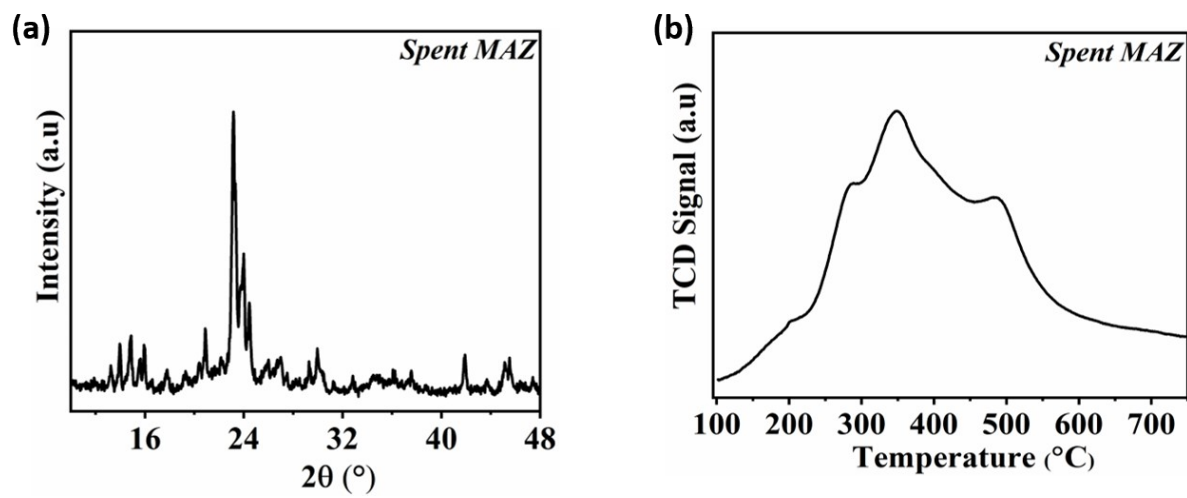

Fig. S7 Spent catalyst results (A) XRD patterns, and (B) NH<sub>3</sub>-TPD profile



Table S1 Comparison of literature reports with the present study

| S. No | Catalyst                               | Reaction conditions<br>(Temperature/time) | Conversion<br>(%) | Yield<br>(%) | Ref. |
|-------|----------------------------------------|-------------------------------------------|-------------------|--------------|------|
| 1     | NbO <sub>2</sub> (OH)                  | 70 °C/60 min                              | 42                | -            | [1]  |
| 2     | Hydrophobized<br>NbO <sub>2</sub> (OH) | 70 °C/60 min                              | 65                | -            | [1]  |
| 3     | Carbon catalyst<br>(GC-1:2)            | RT/180 min                                | 80                | -            | [2]  |
| 4     | Carbon catalyst<br>(GC-1:3)            | RT/180 min                                | 80                | -            | [2]  |
| 5     | Ar-SBA-15                              | 70 °C/30 min                              | 82                | -            | [3]  |
| 6     | Amberlyst-15                           | 70 °C/30 min                              | 86                | -            | [3]  |
| 7     | Nb <sub>5</sub> -HUSY                  | 40 °C/180 min                             | 66                | 65           | [4]  |
| 8     | Nb <sub>15</sub> -HUSY                 | 40 °C/180 min                             | 61                | 60           | [4]  |
| 9     | Ni-MOR                                 | 100 °C/15 min                             | 93                | -            | [5]  |
| 10    | Cu-MOR                                 | 100 °C/15 min                             | 95                | -            | [5]  |
| 11    | H-ZSM-5                                | 50 °C/60 min, methanol<br>(solvent)       | 85                | -            | [6]  |
| 12    | H-Beta                                 | 50 °C/60 min, methanol<br>(solvent)       | 86                | -            | [6]  |
| 13    | H-USY                                  | 50 °C/60 min, methanol<br>(solvent)       | 69                | -            | [6]  |
| 14    | HR/Y zeolite                           | 50 °C/120 min                             | 93                | 72           | [7]  |
| 15    | HR/Y-W <sub>20</sub> zeolite           | 50 °C/120 min                             | 98                | 94           | [7]  |
| 16    | UiO-SO <sub>3</sub> H-0.2              | 60 °C/240 min                             | 70.3              | 70.1         | [8]  |
| 17    | ZSM-5                                  | 70 °C/35 min                              | 22                | -            | [9]  |
| 18    | <i>p</i> -toluene-sulfonic<br>acid     | 70 °C/35 min                              | 80                | -            | [9]  |
| 19    | Amberlyst-15                           | 70 °C/35 min                              | 98                | -            | [9]  |
| 20    | HZSM-5                                 | 50 °C/120 min                             | -                 | 15           | [10] |

|    |                                                                   |                |       |       |                  |
|----|-------------------------------------------------------------------|----------------|-------|-------|------------------|
| 21 | NaOH-pretreated HZSM-5                                            | 50 °C/120 min  | -     | 30    | [10]             |
| 22 | HZSM-5 film capillary                                             | 50 °C/120 min  | -     | 29    | [10]             |
| 23 | ZSM-5                                                             | 60 °C/180 min  | 83    | 36.2  | [11]             |
| 24 | Z-beta                                                            | 60 °C/180 min  | 89    | 52.2  | [11]             |
| 25 | Z-mordenite                                                       | 60 °C/180 min  | 93    | 68.1  | [11]             |
| 26 | HZSM-5                                                            | 60 °C/90 min   | 40    | -     | [12]             |
| 27 | WO <sub>3</sub> /Nb <sub>2</sub> O <sub>5</sub>                   | RT/150 min     | 92.3  | -     | [13]             |
| 28 | MoO <sub>3</sub> -ZrO <sub>2</sub>                                | 60 °C/10 min   | 90    | 84    | [14]             |
| 29 | H-Beta-1 zeolite                                                  | RT/ 60 min     | 86    | 84.7  | [15]             |
| 30 | (C <sub>3</sub> H <sub>7</sub> ) <sub>4</sub> N <sup>+</sup> /PWA | 30 °C /120 min | 94    | -     | [16]             |
| 31 | Hf-TUD-1                                                          | 80 °C/360 min  | 52    | -     | [17]             |
| 32 | H-BEA Zeolite                                                     | 60 °C/60 min   | 72.6  | -     | [18]             |
| 33 | BEA Zeolite                                                       | 30 °C/30 min   | 76    | -     | [19]             |
| 34 | 1.0 M SABEA                                                       | 30 °C/30 min   | 84    | -     | [19]             |
| 35 | γ-Al <sub>2</sub> O <sub>3</sub> -IPA                             | 25 °C/30 min   | 29.1  | 0     | [20]             |
| 36 | 0.2 mol% FeCl <sub>3</sub> /γ-Al <sub>2</sub> O <sub>3</sub> -IPA | 25 °C/30 min   | 99.89 | 98.25 | [20]             |
| 37 | <i>MAZ nanohybrid</i>                                             | 60 °C/120 min  | 100   | >99   | <i>This Work</i> |

Table S2 Composition of crude-bio-glycerol produced from bio-diesel process

|                           |       |
|---------------------------|-------|
| Glycerol % (w/w)          | 86    |
| Water % (w/w)             | 13    |
| Density (g/ml)            | 1.23  |
| Fatty acid esters % (w/w) | 0.05  |
| Ash % (w/w)               | 0.005 |

## References

- [1] T. E. Souza, M. F. Portilho, P. M. T. G. Souza, P. P. Souza, L. C. A. Oliveira, *ChemCatChem* **2014**, *6*, 2961–2969.
- [2] M. Gonçalves, R. Rodrigues, T. S. Galhardo, W. A. Carvalho, *Fuel* **2016**, *181*, 46–54.
- [3] G. Vicente, J. A. Melero, G. Morales, M. Paniagua, E. Martín, *Green Chem.*, **2010**, *12*, 899.
- [4] C. Ferreira, A. Araujo, V. Calvino-Casilda, M. G. Cutrufello, E. Rombi, A. M. Fonseca, M. A. Bañares, I. C. Neves, *Microporous Mesoporous Mater.*, **2018**, *271*, 243–251.
- [5] S. S. Priya, P. R. Selvakannan, K. V. R. Chary, M. L. Kantam, S. K. Bhargava, *Mol. Catal.*, **2017**, *434*, 184–193.
- [6] J. Kowalska-Kuś, A. Held, K. Nowińska, *Chem. Eng. J.*, **2020**, *401*, 126143.
- [7] A. Talebian-Kiakalaieh, S. Tarighi, *J. Ind. Eng. Chem.*, **2019**, *79*, 452–464.
- [8] Y. Jiang, R. Zhou, B. Ye, Z. Hou, *J. Ind. Eng. Chem.*, **2022**, *110*, 357–366.
- [9] C. X. A. da Silva, V. L. C. Gonçalves, C. J. A. Mota, *Green Chem.*, **2009**, *11*, 38–41.
- [10] X. Huang, G. Zhang, L. Zhang, Q. Zhang, *ACS Omega* **2020**, *5*, 20784–20791.
- [11] B. K. Raja, N. Mohindra, U. Goswami, B. Modhera, *Journal of The Institution of Engineers (India): Series E* **2022**, *103*, 145–148.
- [12] M. Alsawalha, *Front Chem* **2019**, *7*, DOI 10.3389/fchem.2019.00799.
- [13] S. B. Putla, P. Subha, B. Swapna, N. Singh, P. Sudarsanam, *Catal Commun* **2024**, *186*, 106827.
- [14] H. Huang, J. Mu, M. Liang, R. Qi, M. Wu, L. Xu, H. Xu, J. Zhao, J. Zhou, Z. Miao, *Mol. Catal.*, **2024**, *552*, 113682.
- [15] P. Manjunathan, S. P. Maradur, A. B. Halgeri, G. V. Shanbhag, *J Mol Catal A Chem.*, **2015**, *396*, 47–54.
- [16] S. Sandesh, A. B. Halgeri, G. V. Shanbhag, *J Mol Catal A Chem.*, **2015**, *401*, 73–80.
- [17] L. Li, T. I. Korányi, B. F. Sels, P. P. Pescarmona, *Green Chem.*, **2012**, *14*, 1611.
- [18] V. Rossa, Y. da S. P. Pessanha, G. Ch. Díaz, L. D. T. Câmara, S. B. C. Pergher, D. A. G. Aranda, *Ind Eng Chem Res.*, **2017**, *56*, 479–488.
- [19] N. J. Venkatesha, Y. S. Bhat, B. S. Jai Prakash, *RSC Adv* **2016**, *6*, 18824–18833.
- [20] T. Zhang, X. Xin, S. Liao, H. Liu, Y. Yu, B. Xu, *ChemistrySelect* **2023**, *8*, DOI 10.1002/slct.202205005.
